1 **RepB C-terminus mutation of an ori pRi vector affects plasmid copy number in**  
2 ***Agrobacterium* and transgene copy number in plants**

3

4 Zarir Vaghchhipawala<sup>1#</sup>, Sharon Radke<sup>2</sup>, Ervin Nagy<sup>1</sup>, Mary L. Russell<sup>2</sup>, Susan Johnson<sup>1,3</sup>,  
5 Stanton B. Gelvin<sup>3</sup>, Larry Gilbertson<sup>1</sup>, and Xudong Ye<sup>1\*</sup>

6 <sup>1</sup>*Monsanto Company, 700 Chesterfield Pkwy, St. Louis, MO 63017*, <sup>2</sup>*Woodland Campus,*  
7 *Monsanto Company, 37437 State Highway 16, Woodland, CA 95695, USA.* <sup>3</sup>*Department of*  
8 *Biological Sciences, Purdue University, 201 S University St., West Lafayette, IN 47907-1392*

9

10

11 \* Corresponding author:

12 Xudong Ye

13 Email: [xudong.ye@monsanto.com](mailto:xudong.ye@monsanto.com)

14 Phone: 636-737-2592

15

16 # Current address:

17 KWS Gateway Research Center

18 1005 N Warson Rd

19 St. Louis MO 63132

20 Email: [zarir.vaghchhipawala@kws.com](mailto:zarir.vaghchhipawala@kws.com)

21 **ABSTRACT**

22 A native *repABC* replication origin, ori pRi, was previously reported as a single copy plasmid in  
23 *Agrobacterium tumefaciens* and can improve the production of transgenic plants with a single  
24 copy insertion of transgenes when it is used in binary vectors for *Agrobacterium*-mediated  
25 transformation. A high copy ori pRi variant plasmid, pTF::Ri, which does not improve the  
26 frequency of single copy transgenic plants, has been reported in the literature. Sequencing the  
27 high copy pTF::Ri *repABC* operon revealed the presence of two mutations: one silent mutation  
28 and one missense mutation that changes a tyrosine to a histidine (Y299H) in a highly conserved  
29 area of the C-terminus of the RepB protein (RepB<sup>Y299H</sup>). Reproducing these mutations in the  
30 wild-type oriRi binary vector showed that *Agrobacterium* cells with the RepB<sup>Y299H</sup> mutation  
31 grow faster on both solidified and in liquid medium, and have higher plasmid copy number as  
32 determined by ddPCR. In order to investigate the impact of the RepB<sup>Y299H</sup> mutation on  
33 transformation and quality plant production, the RepB<sup>Y299H</sup> mutated ori pRi binary vector was  
34 compared with the original wild-type ori pRi binary vector and a multi-copy oriV binary vector  
35 in canola transformation. Molecular analyses of the canola transgenic plants demonstrated that  
36 the multi-copy ori pRi with the RepB<sup>Y299H</sup> mutation in *Agrobacterium* cells lost the advantage of  
37 generating high frequency single copy, backbone-free transgenic plants compared to using the  
38 single copy wild-type ori pRi binary vector.

## 39 INTRODUCTION

40 Single copy, vector backbone-free transgene events are required by government regulatory  
41 agencies for commercial transgenic product deployment, and are preferred for many other  
42 biotechnology applications. This is because most vector backbones contain antibiotic genes and  
43 other not fully characterized sequences, and that multi-copy transgenes may have reduced or  
44 silenced gene expression [1-3]. Efforts have been made to increase single copy transgene  
45 frequency, and to eliminate the presence of vector backbone sequences in transgenic plants using  
46 particle bombardment or *Agrobacterium*-mediated transformation [4-9]. Lowering DNA loading  
47 in particle bombardment [4-8], or using a single copy binary vector rather than multi-copy  
48 vectors in *Agrobacterium* transformation [9], can significantly increase single copy transgenic  
49 plant production.

50

51 *Agrobacterium*-mediated plant transformation often uses a binary vector to maintain the plasmid  
52 in *Escherichia coli* for gene cloning manipulation and in *Agrobacterium* cells to deliver the T-  
53 strand into plant cells. Different origins of replication control the binary vector copy number in  
54 *Agrobacterium* which can further affect T-strand processing and integration into the plant  
55 genome. The broad host range plasmid RK2-derived origin of replication (RK2 oriV,  
56 incP $\alpha$  group, GenBank accession #J01780) replicates to approximately 10 copies/*Agrobacterium*  
57 chromosome [10], whereas the ori pRi (oriRi, GenBank accession # X04833), a plasmid with the  
58 origin of replication from the *Agrobacterium rhizogenes* plasmid pRiA4b, replicates the plasmid  
59 as 1 copy/*Agrobacterium* chromosome [11-13]. Native oriRi-based binary vectors produce a  
60 higher percentage of single copy, backbone free transgenic plants across multiple crops than do  
61 multi-copy binary vectors [9]. A new variant of the ori pRi replicon, named pTF::Ri, has been  
62 GGCAAGAACAATCCTCAAACCA reported at an estimated 15-20 copies of binary plasmid  
63 per *Agrobacterium* cell. This ori provided no advantage in single copy transgenic plant  
64 production [14].

65

66 The oriRi plasmid contains the *repABC* operon encoding the RepA and RepB proteins for  
67 plasmid partitioning, and the replication initiator protein RepC for DNA synthesis [15,16]. A  
68 small RNA, which binds to the region of *repABC* mRNA between *repB* and *repC*, tightly  
69 regulates *repC* expression to control plasmid copy number and determines plasmid

70 incompatibility [17,18]. RepB proteins bind specifically to *parS*-like sequences, and are required  
71 for proper segregation of replicated plasmids to daughter cells. RepB can form dimers and  
72 oligomers in solution. The middle part of RepB is responsible for *parS* binding and the C-  
73 terminus determines RepB dimerization/oligomerization [19]. The *parS* binding site identified in  
74 the plasmid pRiA4b is 28 bp downstream from the end of the *repC* ORF [20].

75

76 To address the discrepancy between the oriRi [9] and pTF::Ri [14] results, we sequenced the  
77 high copy plasmid pTF::Ri. Sequence analysis of the entire plasmid resulted in the identification  
78 of two point mutations in the *repB* gene of the oriRi plasmid. In this manuscript, we characterize  
79 these two oriRi *repB* mutations for their effect on plasmid copy number in *Agrobacterium*, and  
80 their impact on the frequency of single copy, backbone-free transgenic canola plant production.

81

## 82 **MATERIALS AND METHODS:**

83

### 84 **Plasmid sequence and construction:**

85 The high copy oriRi plasmid pTF::Ri [14] was sequenced and assembled by the Monsanto  
86 sequence center. This new sequence was aligned with the published pRiA4b sequence (GenBank  
87 accession # X04833) using the EMBOSS::Needle program  
88 (<http://www.ebi.ac.uk/Tools/emboss/align/index.html>).

89

90 The oriRi plasmid pMON83937 [9] was used for all site-directed mutagenesis experiments using  
91 the QuickChange II protocol (Agilent Cat # 200521). The primers 5'  
92 GATCATGTGCCAGCGCTG**cAT**CAAGCGTACCACGCTG 3' (forward) and 5'  
93 CAGCGTGGTACGCTTG**ATg**CAGCGCTGGCACATGATC 3' (reverse) were used to generate  
94 the RepB<sup>Y299H</sup> mutation, whereas the primers 5'  
95 GCAGTTTTCTCGAGAG**ATc**GTCATCGCCGCGATGTTCG 3' (forward) and  
96 5' CGACATCGCGGCGATGAC**gAT**TCTCTCGAGAAACTGC 3' (reverse) were used to  
97 produce the *repB* T486C silent mutation. Ten ng of pMON83937 was used in a 50 µl reaction  
98 volume and amplified for 25 cycles with 5 min elongation time. The reaction mixture was  
99 incubated with *DpnI* to remove the template and transfected into *E. coli* DH10B competent cells

100 to recover the plasmids. The resultant plasmids were extracted using a Qiagen maxiprep kit and  
101 verified by full plasmid sequencing.

102

### 103 ***Agrobacterium* DNA extraction and plasmid copy number determination**

104 *Agrobacterium* total DNA was prepared according to Estrella et al. [21] with modifications.  
105 Briefly, *Agrobacterium* containing the corresponding plasmids was grown in LB medium at  
106 30°C with 50 mg/L spectinomycin selection. When the A<sub>600</sub> reached approximately 1.0, 1 ml of  
107 *Agrobacterium* cells was harvested into an Eppendorf tube and centrifuged at 15000 rpm for 5  
108 min. The pellet was suspended in 300 µl P1 buffer (from Qiagen Maxiprep kit with RNaseA),  
109 100 µl N-lauroylsarcosine (5% solution in TE) and mixed well, followed by addition of 100 µl  
110 Pronase (Calbiochem, 2.5 mg/ml solution in TE buffer). The solution was incubated at 37°C for  
111 ~2 hours. The lysate was sheared by passing through a 1 ml pipet tip ~10 times, extracted twice  
112 with an equal volume of phenol/chloroform (pH 8), and then twice with an equal volume of  
113 chloroform. Total DNA from the aqueous phase was precipitated by addition of an equal volume  
114 of isopropanol at room temperature, followed by centrifugation at 15000 rpm at 4°C for 10 min.  
115 The DNA pellet was washed with 70% ethanol, air-dried, suspended in 100 µl water, and  
116 quantified by a Thermo Fisher Nanodrop instrument.

117

118 Plasmid copy number was determined using droplet digital PCR (ddPCR) according to Jahn et  
119 al. [22] with minor modifications. Primers and MGB (minor groove binding) probes were  
120 designed using Primer Express 3.0 (Thermo Fisher Scientific, [www.thermofisher.com](http://www.thermofisher.com)). The  
121 plasmid-specific Taqman assay was designed to target a β-glucuronidase (GUS) expression  
122 cassette included in all plasmids. The native *Agrobacterium* gene *lipA* (GenBank AE007869.2)  
123 was used as a chromosomal reference template. The *gusA* and *lipA* probes were labeled with  
124 FAM and VIC fluorophores, respectively. The primers 5' AGCCTTCCACGCCTTTCCT 3'  
125 (forward) and 5' CCGCTTTTCCCGACGAT 3' (reverse) were used to amplify a *lipA* short  
126 sequence, and the MGB (minor groove binding) Taqman probe VIC-5' CCACCTTGCAGATTG  
127 3'-MGB was used for real time *lipA* amplification. The primers 5'  
128 ACCGAATACGGCGTGGATAC 3' (forward) and 5' TCCAGCCATGCACACTGATAC 3'  
129 (reverse) were used to amplify a *gusA* short sequence, and the MGB Taqman probe 6FAM-5'  
130 TGTACACCGACATGTGG 3'-MGB was used for real time *gusA* amplification. Duplex PCR

131 reactions were performed following the manufacturer's recommendations [23]. The 20  $\mu$ l  
132 reaction volume included 0.24 pg/ $\mu$ l total template DNA. The concentrations of each primer and  
133 probe were 0.9  $\mu$ M and 0.25  $\mu$ M, respectively. Following an initial denaturation step at 95°C, a  
134 two-step amplification cycle (94°C and 59°C) was repeated 40 times. Four technical replicates  
135 were taken for each DNA sample. Template concentrations were calculated by the Quantasoft  
136 1.4 software (Bio-Rad, [www.bio-rad.com](http://www.bio-rad.com)) and were given as copy/ $\mu$ l values. Plasmid copy  
137 numbers were calculated by normalizing the *gusA* template concentrations to the *lipA* template  
138 concentrations.

139

#### 140 **Canola transformation:**

141 The pMON83937 RepB<sup>Y299H</sup> mutation plasmid (designated as pMON138207), the original oriRi  
142 binary vector pMON83937, and the oriV binary vector pMON67438 [9] were transferred into  
143 *Agrobacterium tumefaciens* ABI and plasmid-containing bacteria were selected using 50 mg/L  
144 spectinomycin and 50 mg/L kanamycin. Canola (*Brassica napus* L, cultivar Ebony)  
145 transformation, CP4 transgene copy number determination, and statistical analysis have been  
146 described previously [9].

147

#### 148 **Statistical analysis:**

149

150 All experiments were carried out under identical conditions and repeated at least three times.  
151 Canola explants were randomized before *Agrobacterium* inoculation. Data are presented as  
152 averages of the mean of three independent experiments with standard deviation. Significant  
153 differences among the results were assessed by Analysis of Variance (ANOVA).

154

155

## 156 **RESULTS AND DISCUSSION**

157

### 158 **pTF::Ri RepB protein sequence has a mutation in a highly conserved residue at the C-** 159 **terminus**

160

161 Sequence alignment of the sequence of pTF::Ri with the GenBank ori pRi (# X04833) indicates  
162 that there are two T to C point mutations in the *repB* gene of the oriRi: one a T to C silent

163 mutation at 486 bp of the *repB* coding region (*repB* T486C), and the other a T to C point  
164 mutation at 895 bp of the *repB* gene leading to a Y299H mutation (RepB<sup>Y299H</sup>; see the *repB*  
165 alignment in **Supporting information**). The RepB<sup>Y299H</sup> mutation results in a change from a  
166 hydrophobic to a hydrophilic amino acid in the C-terminal region (Figure 1).

167

168

169 **Figure 1: Sequence alignment between part of the genes encoding wild-type *repB* and *repB***  
170 **from the pTF::Ri binary vector.** The T to C changes are highlighted. The *repB* stop codon is  
171 marked in red. Upper strand: wild-type *repB* from GenBank X04833; lower strand: pTF::Ri  
172 sequence.

173

174 To investigate the potential role of the RepB C-terminal sequence, we aligned 26 RepB C-  
175 termini from GenBank (Figure 2). The oriRi RepB Y299 is conserved in the majority of *repABC*  
176 replicons, indicating that it may play an important role in RepB function.

177

178

179 **Figure 2: Alignment of the oriRi RepB C-terminus with other RepB C-termini.** Arrow  
180 indicates the Y299H point mutation. The number at right indicates the last amino acid of each  
181 RepB protein. (GenBank accession: oriRi, # X04833; pRL7, *Rhizobium leguminosarum* bv.  
182 *viciae* plasmid #AM236081; C58linear, *Agrobacterium tumefaciens* str. C58 linear chromosome  
183 # AE007870.2; pRL12, *Rhizobium leguminosarum* bv. *viciae* plasmid pRL12 # AM236086;  
184 pRtTA1d, *Rhizobium leguminosarum* bv. *trifolii* strain TA1 plasmid # FJ592234; pNGR234b,  
185 *Sinorhizobium fredii* NGR234 plasmid pNGR234b # CP000874; p42b, *Rhizobium etli* CFN 42  
186 plasmid p42b # NC\_007763; pRLG204, *Rhizobium leguminosarum* bv. *trifolii* WSM2304  
187 plasmid pRLG204 # NC\_011371; pR132504, *Rhizobium leguminosarum* bv. *trifolii* WSM1325  
188 plasmid pR132504; pRL9, *Rhizobium leguminosarum* bv. *viciae* plasmid pRL9 # NC\_008379;  
189 pRLG201, *Rhizobium leguminosarum* bv. *trifolii* WSM2304 plasmid pRLG201; pNGR234a;  
190 *Sinorhizobium fredii* NGR234 plasmid pNGR234a # U00090; pR132502, *Rhizobium*  
191 *leguminosarum* bv. *trifolii* WSM1325 plasmid pR132502; pRtTA1b, *Rhizobium leguminosarum*  
192 bv. *trifolii* strain TA1 plasmid pRtTA1b # FJ592235; pRLG202, *Rhizobium leguminosarum* bv.  
193 *trifolii* WSM2304 plasmid pRLG202 3 # NC\_011366; p42e, *Rhizobium etli* CFN 42 plasmid



194 p42e # NC\_007765; pRL8, *Rhizobium leguminosarum* bv. *viciae* plasmid pRL8 # NC\_008383;  
195 pTiBo542, *Agrobacterium tumefaciens* Ti plasmid pTiBo542 # DQ058764; pTiC58,  
196 *Agrobacterium tumefaciens* str. C58 Ti plasmid # NC\_003065; pTiA6, *Agrobacterium*  
197 *tumefaciens* octopine-type Ti plasmid # AF242881; p42a, *Rhizobium etli* CFN 42 plasmid p42a #  
198 CP000134; pRtTA1a, *Rhizobium leguminosarum* bv. *trifolii* TA1 plasmid pRtTA1a #  
199 HM032068; pRi1724, *Agrobacterium rhizogenes* plasmid pRi1724 # NC\_002575; pRtTA1c,  
200 *Rhizobium leguminosarum* bv. *trifolii* TA1 plasmid pRtTA1c # EU555187; pRL10, *Rhizobium*  
201 *leguminosarum* bv. *viciae* plasmid pRL10 # NC\_008381; pRLG203, *Rhizobium leguminosarum*  
202 bv. *trifolii* WSM2304 plasmid pRLG203 # NC\_011370). Yellow, red, and blue shading indicate  
203 generally conserved amino acids.

204

### 205 **The RepB<sup>Y299H</sup> mutation enhances culture growth and increases plasmid copy number in** 206 ***Agrobacterium***

207

208 The *repABC* sequence in the oriRi replicon of pMON83937 used in a prior study [9] is identical  
209 to that of the oriRi GenBank reference sequence. To address the question of whether the  
210 presence of either or both mutations leads to the increase in plasmid copy number in  
211 *Agrobacterium* [14], we carried out site-directed mutagenesis to recapitulate the T to C base  
212 changes at 486 bp and 895 bp in pMON83937. These two plasmids were designated  
213 pMON83937-*repB*<sup>T486C</sup> and pMON83937-RepB<sup>Y299H</sup>, respectively. Both plasmids and the  
214 control pMON83937 were separately introduced into the nopaline-type strain *Agrobacterium*  
215 *tumefaciens* ABI [9] by electroporation, and the cultures were spread on LB medium containing  
216 50 mg/L spectinomycin and 10 mg/L gentamicin. After 72 hours, colonies harboring RepB<sup>Y299H</sup>  
217 were much larger than those containing the control plasmid or the *repB* T486C silent mutation  
218 (Figure 3). The faster growth could result from elevated plasmid copy number, providing a  
219 growth advantage from the multiple copies of the *aadA* gene [24]. To investigate this  
220 phenomenon further, at least two individual colonies from two sequence confirmed plasmids per  
221 mutation were suspended into 5 ml LB medium with the requisite antibiotics at A<sub>660</sub>=0.5, an  
222 equal volume of culture was inoculated into 50 ml medium, and the ODs recorded after  
223 overnight growth (21 hrs). Over three repetitions of this experiment, the cultures with the  
224 RepB<sup>Y299H</sup> mutation consistently showed a 120-125% higher A<sub>660</sub> over the control, whereas the



225  $A_{660}$  of the *repB*<sup>T486C</sup> cultures showed 90% growth compared to the control (Figure 3B).  
226 Cultures containing the RepB<sup>Y299H</sup> mutation reached  $A_{660}$ =1.0 about 3 hours earlier than did the  
227 control culture.

228  
229 To check for increase in copy number of the plasmids with the mutations, cultures were grown to  
230  $A_{660}$ =1.0 and equal volumes were prepared for plasmid isolation. DNA from the preps was  
231 digested with *AflIII* to give a distinct three band pattern (7.3 kb, 4.9 kb, 1.7 kb) on agarose gels.  
232 The gel picture clearly shows higher DNA concentration of each band on the gel from the  
233 RepB<sup>Y299H</sup> cultures compared to the control (Figure 3C). DNA concentrations were not taken  
234 into consideration due to contamination with genomic DNA as observed on the gel. These  
235 observations indicate an increase in plasmid copy number resulting from the Y299H mutation.

236  
237  
238 **Figure 3: Comparison of oriRi binary plasmid growth and plasmid yield.** Panel A) Colony  
239 size on solidified medium: a) pMON83937, WT-RepB; b) pMON83937-RepB<sup>Y299H</sup>; c)  
240 pMON8393-*repB*<sup>T486C</sup> silent mutation; Panel B) Growth rate in liquid medium: a1, a2; two  
241 colonies from pMON83937, b1, b2; two colonies from pMON83937-RepB<sup>Y299H</sup>, c1, c2, two  
242 colonies from pMON8393-*repB*. Panel C) agarose gel showing plasmid yields from wild-type,  
243 RepB<sup>Y299H</sup> and *repB*<sup>T486C</sup> correspondingly. Error bars are shown in the diagram. \*significant at  
244 P= 0.01.

245  
246 To determine plasmid copy number in *Agrobacterium*, a DNA-based Taqman assay was  
247 employed using the single copy *Agrobacterium* chromosomal gene *lipA* as an internal copy  
248 number control. Atu0972 (*lipA*) was chosen as the internal control for comparison to the *gusA*  
249 sequence in the binary vectors because *lipA* copy number does not vary upon acetosyringone  
250 treatment [25]. A third *repB* double mutation plasmid, pMON83937 RepB<sup>Y299H</sup> + *repB*<sup>T486C</sup>, was  
251 produced for copy number determination. As shown in Figure 4, the plasmid copy numbers  
252 varied between 1 (pMON83937, native oriRi) and 12 (pMON67438, multi-copy oriV binary  
253 vector) per cell. The oriRi RepB<sup>Y299H</sup> mutant and the RepB<sup>Y299H</sup> and *repB*<sup>T486C</sup> double mutants

254 were estimated to contain 9-10 copies/cell (Figures 4D and F), whereas the oriRi *repB*<sup>T486C</sup> silent  
255 mutation alone showed approximately 1 copy/cell (Figure 4E).

256

257

258 **Figure 4: *Agrobacterium* plasmid copy number determination by ddPCR.** A) *A. tumefaciens*  
259 no binary plasmid control; B) pMON67438 oriV replicon; C) pMON83937 oriRi native *repB*; D)  
260 pMON83937 RepB<sup>Y299H</sup>; E) pMON83937 *repB*<sup>T486C</sup>; F) pMON83937 RepB<sup>Y299H</sup> + *repB*<sup>T486C</sup>  
261 double mutations. Error bars are shown in the diagram. \*significant at P = 0.01.

262

263 The increased copy number of the oriRi with the RepB<sup>Y299H</sup> mutation in *Agrobacterium* may  
264 result from decreased RepB<sup>Y299H</sup> binding activity to the inverted repeat (IR) in RepD [26]. The  
265 C-terminus of RepB from *Rhizobium leguminosarum* is responsible for RepB  
266 dimerization/oligomerization [19], and is conserved among the *repABC* family (Figure 2).  
267 However, whether the RepB<sup>Y299H</sup> mutation in our oriRi binary vector affects dimerization has not  
268 been experimentally determined. It is less likely that the RepB<sup>Y299H</sup> mutation reduces RepB  
269 interaction with RepA because the N-terminus of RepB is required for RepA interaction [19].  
270 The *repABC* promoter 4 (P4) in *Agrobacterium* is repressed by RepA, whose activity is strongly  
271 enhanced by RepB [27]. The RepB<sup>Y299H</sup> mutation may also reduce cooperative binding to  
272 *repABC* promoters, which further affects plasmid partitioning due to reduced oligomerization.  
273 The stability of the *repABC* replicon with the RepB<sup>Y299H</sup> mutation was not determined because  
274 our plant transformation experiments were carried out with antibiotic selection, as was the case  
275 in previous experiments by Oltmanns et al. [14]. It is possible that the mutation affects  
276 dimerization/oligomerization, which partially blocks plasmid partitioning and leads to the  
277 accumulation of higher plasmid copy numbers in cells. Plasmid-free *Agrobacterium* cells may be  
278 avoided or minimized because the *Agrobacterium* used for plant transformation was grown using  
279 antibiotic selection.

280

281 The difference in plasmid copy number between Oltmanns et al. [14] and this study may result  
282 from the assay method, *Agrobacterium* strain, or growth time difference. Plasmid copy numbers  
283 are determined primarily by their replication origins, which show significant cell-to-cell variation  
284 within every population [28]. Oltmanns et al. [14] reported 15-20 copies/cell with pTF::Ri

285 carrying RepB<sup>Y299H</sup> and *repB*<sup>T486C</sup> mutations in *A. tumefaciens* EHA105 using a DNA blot assay,  
286 whereas in this study we estimated that both the single and the double mutations in a nopaline-  
287 type ABI strain have 9-10 copies/cell, using a ddPCR assay. The DNA blot method likely has  
288 less resolution. The control vector RK2 oriV vector was estimated to be 7-10 copies/cell by DNA  
289 blot [14] [14] and 12 copy/cell by ddPCR in this study. In previous work we estimated the  
290 control RK2 oriV vector in ABI strain is 4-8 times relative to the native oriRi vector signals by  
291 DNA blot analysis [9]. The RK2 oriV copy number determined by ddPCR is close to the RK2  
292 oriV-containing plasmid pSoup which was determined by a real time PCR method [10].

293

294

295 **The wild-type oriRi outperforms the RepB<sup>Y299H</sup> mutated oriRi for generating single copy,**  
296 **backbone-free transgenic events in canola transformation**

297

298 Due to the contradictory observations in single copy, backbone-free plant production between  
299 the two versions of oriRi binary vectors [9,14], we speculated that the higher copy number of  
300 pTF::Ri [14] with the RepB<sup>Y299H</sup> mutation abolished the advantage of the native oriRi binary  
301 vector for production of single copy transgenic plants. To test this hypothesis, we compared the  
302 wild-type oriRi binary vector (pMON83937) and the RepB<sup>Y299H</sup> mutant (pMON138207), as well  
303 as the multi-copy oriV binary vector (pMON67438), in canola transformation. In total, 1262  
304 transgenic canola events were generated for all three constructs, and all three constructs showed  
305 statistically equivalent transformation frequencies, which is defined as the number of  
306 independent transformed plants produced per number of explants used (Figure 5). Both the single  
307 copy and the single copy, backbone-free transgenic plant frequencies were equivalent between  
308 the multi-copy oriV binary vector and the oriRi vector with RepB<sup>Y299H</sup> high copy mutant,  
309 whereas the native single copy oriRi vector showed a significant improvement in the frequency  
310 of plants with a single copy of the transgene and absence of vector backbone sequences. The  
311 frequency of plants containing vector backbone sequences was decreased three-fold using the  
312 native oriRi vector compared to the oriV and the high copy oriRi mutant vectors.

313

314

315 **Figure 5: Effect of the oriRi with RepB<sup>Y299H</sup> mutation on quality transgenic canola plant**  
316 **production.** Total oriV (pMON67438) events n=421; total oriRi (pMON83937 ) events, n=379;  
317 total oriRi RepB<sup>Y299H</sup> (pMON138207) events n=462. Error bars are shown in the diagram.

318 \*significant at P = 0.01. TF: transformation frequency (transgenic events/explant number); 1  
319 copy CP4: single copy CP4 positive frequency; 1 copy CP4 BKB-free: single copy CP4 positive,  
320 backbone-free transgenic plant frequency; BKB+: backbone positive transgenic plant frequency.

321  
322 This canola transformation result is consistent with the earlier observation that the high copy  
323 pTF::Ri resulted in a similar frequency in single copy, backbone-free plants to the multi-copy  
324 RK2 oriV binary vectors [14]. Our results support the hypothesis that T-DNA border processing  
325 involves a stoichiometric reaction between the endonuclease VirD2 and the border elements, and  
326 an excess of borders may titrate-out VirD2, resulting in incomplete processing [9,29]. This  
327 hypothesis is also supported by experiments in which a T-DNA was integrated as a single copy  
328 into an *Agrobacterium* chromosome, which drastically decreased *Agrobacterium* chromosome  
329 integration frequency in transgenic plants compared to other multi-copy binary vectors [14].

330  
331

## 332 CONCLUSION

333  
334 Our data confirmed that the RepB C-terminus is critical for *repABC* replicon partitioning [19]. A  
335 single nucleotide mutation at RepB<sup>Y299H</sup> in the ori pRi derived plant transformation binary  
336 vectors is responsible for an increase in plasmid copy number in *Agrobacterium*, and a  
337 concomitant decrease in relative frequency of single copy, backbone-free transgenic plants  
338 produced. This result also cautions biotechnological researchers that sequence confirmation is  
339 required for critical experiments and applications, since a single nucleotide mutation could lead  
340 to a very different conclusion.

341  
342

## 343 Author contribution statement

344 LG, SBG and XY conceived and coordinated the research. ZV made all plasmid mutagenesis.  
345 SJ created the original multi-copy ori pRi plasmid. SR and MLR conducted canola

346 transformation. EN performed plasmid copy number estimation. ZV, SR, EN and XY analyzed  
347 the data. XY and ZV drafted the manuscript. All authors read and approved the manuscript.

348

#### 349 **Acknowledgment:**

350 We thank our colleagues at the Monsanto Genome Sequencing Center for sequencing the pRi::Ti  
351 plasmid and all *repB* mutants, Drs. David Somers and Doug Boyes for supporting this research,  
352 and Dr. Charles Armstrong for critical review of the manuscript.

353

#### 354 **Compliance with ethical standards**

355

#### 356 **Conflict of interest**

357 The authors declare that they have no conflict of interest.

358

359

#### 360 **REFERENCE**

- 361 **1.** Jiang Y, Hu X, Huang H. Recent patents on biosafety strategies of selectable marker genes in  
362 genetically modified crops. *Recent Patents on Food, Nutrition & Agriculture*. 2014; 6: 3–15.
- 363 **2.** Matzke AJM, Neuhuber F, Park YD, Ambros PF, MA Matzke. Homology-dependent gene  
364 silencing in transgenic plants: epistatic silencing loci contain multiple copies of methylated  
365 transgenes. *Mol Gen Genet*. 1994; 244: 219–229.
- 366 **3.** Travella S, Ross SM, Harden J, Everett C, Snape JW, Harwood WA. A comparison of  
367 transgenic barley lines produced by particle bombardment and *Agrobacterium*-mediated  
368 techniques. *Plant Cell Rep*. 2005; 23: 780–789.
- 369 **4.** De Buck S, Peck I, De Wilde C, Marjanac G, Nolf J, De Paepe A, Depicker A. Generation of  
370 single-copy T-DNA transformants in *Arabidopsis* by the CRE/loxP recombination-mediated  
371 resolution system. *Plant Physiol*. 2007; 145: 1171–1182.
- 372 **5.** Fu X, Duc LT, Fontana S, Bong BB, Tinjuangjun P, Sudhakar D, Twyman RM, Christou P,  
373 Kohli A. Linear transgene constructs lacking vector backbone sequences generate low-copy-  
374 number transgenic plants with simple integration patterns. *Transgenic Res*. 2000; 9: 11–19.

- 375 6. Jackson MA, Anderson DJ, Birch RG. Comparison of *Agrobacterium* and particle  
376 bombardment using whole plasmid or minimal cassette for production of high-expressing,  
377 low-copy transgenic plants. *Transgenic Res.* 2013; 22: 143–151.
- 378 7. Lowe BA, Shiva Prakash N, Way M, Mann MT, Spencer TM, Boddupalli RS. Enhanced  
379 single copy integration events in corn via particle bombardment using low quantities of  
380 DNA. *Transgenic Res.* 2009; 18: 831–840.
- 381 8. Shiva Prakash N, Bhojaraja R, Shivbachan SK, Hari Priya GG, Nagraj TK, Prasad V,  
382 Srikanth Babu V, Jayaprakash TL, Dasgupta S, Spencer TM, Boddupalli RS. Marker-free  
383 transgenic corn plant production through co-bombardment. *Plant Cell Rep.* 2009; 28: 1655–  
384 1668.
- 385 9. Ye X, Williams EJ, Shen J, Johnson S, Lowe B, Radke S, Strickland S, Esser JA, Petersen  
386 MW, Gilbertson LA. Enhanced production of single copy backbone-free transgenic plants in  
387 multiple crop species using binary vectors with a pRi replication origin in *Agrobacterium*  
388 *tumefaciens*. *Transgenic Res.* 2011; 20: 773–786.
- 389 10. Hellens RP, Edwards EA, Leyland NR, Bean S, Mullineaux PM. pGreen: A versatile and  
390 flexible binary Ti vector for *Agrobacterium*-mediated plant transformation. *Plant Mol Biol.*  
391 2000; 42: 819–832.
- 392 11. Gallie DR, Zaitlin D, Perry KL, Kado CI. Analysis of *Agrobacterium tumefaciens* plasmid  
393 pTiC58 replication region with a novel high-copy-number derivative. *J Bacteriol.* 1985; 161:  
394 1034–1041.
- 395 12. Jouanin L, Vilaine F, d’Enfert C, Casse-Delbart F. Localization and restriction maps of the  
396 replication origin regions of the plasmids of *Agrobacterium rhizogenes* strain A4. *Mol Gen*  
397 *Genet.* 1985; 201: 370–374.
- 398 13. Nishiguchi R, Takanami M, Oka A. Characterization and sequence determination of the  
399 replicator region in the hairy-root-inducing plasmid pRiA4b. *Mol Gen Genet.* 1987; 206: 1–  
400 8.
- 401 14. Oltmanns H, Frame B, Lee Y, Johnson S, Li B, Wang W, Gelvin SB. Generation of  
402 “backbone” free, low transgene copy plants by launching T-DNA from the *Agrobacterium*  
403 chromosome. *Plant Physiol.* 2010; 152: 1158–1166.
- 404 15. Pinto UM, Pappas KM, Winans SC. The ABCs of plasmid replication and segregation. *Nat*  
405 *Rev Microbiol.* 2012; 10: 755–765.

- 406 **16.** Ramírez-Romero MA, Soberón N, Pérez-Oseguera A, Téllez-Sosa J, Cevallos MA.  
407 Structural elements required for replication and incompatibility of the *Rhizobium etli*  
408 symbiotic plasmid. *J Bacteriol.* 2000; 182: 3117–3124.
- 409 **17.** Venkova-Canova T, Soberón NE, Ramírez-Romero MA, Cevallos MA. Two discrete  
410 elements are required for the replication of a *repABC* plasmid: An antisense RNA and a  
411 stem-loop structure. *Mol Microbiol.* 2004; 54: 1431–1444.
- 412 **18.** Chai Y, Winans SC. A small antisense RNA downregulates expression of an essential  
413 replicase protein of an *Agrobacterium tumefaciens* Ti plasmid. *Mol Microbiol.* 2005; 56:  
414 1574–1585.
- 415 **19.** Koper P, Żebracki K, Marczak M, Skorupska A, Mazur A. RepB proteins of the multipartite  
416 *Rhizobium leguminosarum* bv. trifolii genome discriminate between centromere-like *parS*  
417 sequences for plasmid segregational stability. *Mol Microbiol.* 2016; 102: 446–466.
- 418 **20.** Cevallos MA, Cervantes-Rivera R, Gutiérrez-Ríos RM (2008) The *repABC* plasmid family.  
419 *Plasmid.* 2008; 60: 19–37.
- 420 **21.** Estrella MJ, Muñoz S, Soto MJ, Ruiz O, Sanjuán J. Genetic diversity and host range of  
421 rhizobia nodulating *Lotus tenuis* in typical soils of the Salado River Basin (Argentina). *Appl*  
422 *Environ Microbiol.* 2009; 75: 1088–1098.
- 423 **22.** Jahn M, Vorpahl C, Turkowsky D, Lindmeyer M, Buhler B, Harms H, Muller S. Accurate  
424 determination of plasmid copy number of flow-sorted cells using droplet digital PCR. *Anal*  
425 *Chem.* 2014; 86: 5969–5976.
- 426 **23.** Hindson BJ, Ness KD, Masquelier DA, Belgrader P, Heredia NJ, Makarewicz AJ, Bright IJ,  
427 Lucero MY, Hiddessen AL, Legler TC, Kitano TK, Hodel MR, Petersen JF, Wyatt PW,  
428 Steenblock ER, Shah PH, Bousse LJ, Troup CB, Mellen JC, Wittmann DK, Erndt NG,  
429 Cauley TH, Koehler RT, So AP, Dube S, Rose KA, Montesclaros L, Wang S, Stumbo DP,  
430 Hodges SP, Romine S, Milanovich FP, White HE, Regan JF, Karlin-Neumann GA, Hindson  
431 CM, Saxonov S, Colston BW. High-throughput droplet digital PCR system for absolute  
432 quantitation of DNA copy number. *Anal Chem.* 2011; 83: 8604–8610.
- 433 **24.** Kamio Y, Tabuchi A, Itoh Y, Katagiri H, Terawaki Y. Complete nucleotide sequence of  
434 mini-Rts1 and its copy mutant. *J Bacteriol.* 1984; 158: 307–312.
- 435 **25.** Anand A, Uppalapati SR, Ryu CM, Allen SN, Kang L, Tang Y, Mysore KS. Salicylic acid  
436 and systemic acquired resistance play a role in attenuating crown gall disease caused by  
437 *Agrobacterium tumefaciens*. *Plant Physiol.* 2008; 146: 703–715.



- 438 **26.** Chai Y, Winans SC. RepB protein of an *Agrobacterium tumefaciens* Ti plasmid binds to two  
439 adjacent sites between *repA* and *repB* for plasmid partitioning and autorepression. Mol  
440 Microbiol. 2005; 58: 1114–1129.
- 441 **27.** Pappas KM, Winans SC. The RepA and RepB autorepressors and TraR play opposing roles  
442 in the regulation of a Ti plasmid *repABC* operon. Mol Microbiol. 2003; 49: 441–455.
- 443 **28.** Plotka, M., Wozniak, M. and Kaczorowski, T. Quantification of plasmid copy number with  
444 single colour droplet digital PCR. *PLoS One*. 2017; 12, e0169846.
- 445 **29.** Tinland B. Reassessing T-DNA insertions. Trends Plant Sci. 1998; 3: 125.

Figure 1

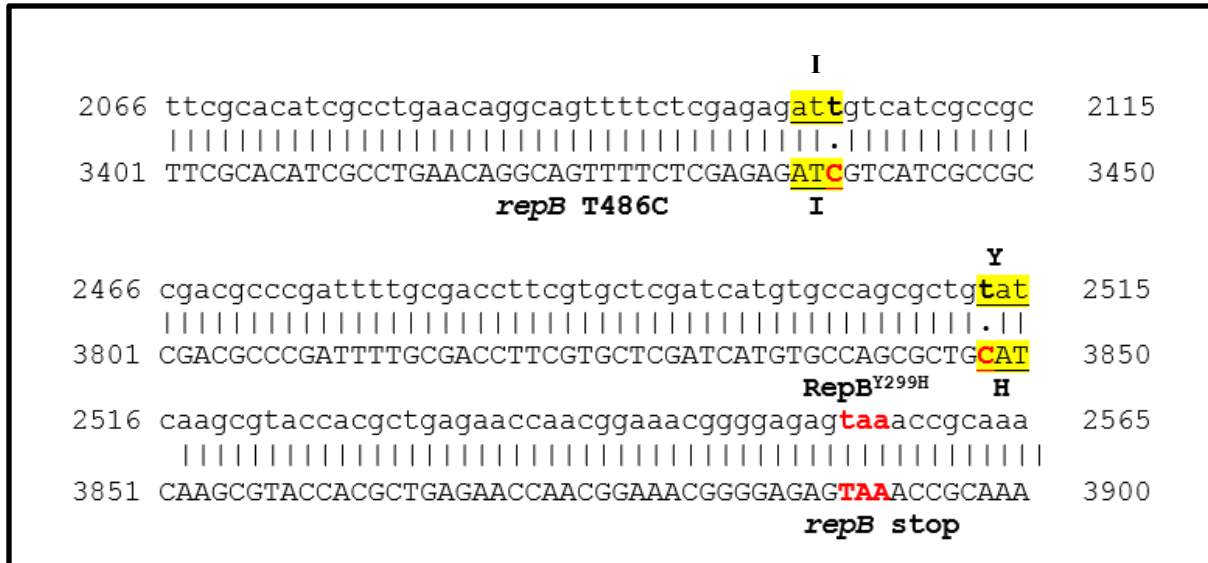

Figure 2

|           | ↓                                                                                                                                 |     |
|-----------|-----------------------------------------------------------------------------------------------------------------------------------|-----|
| oriRi     | ITIDRKATPDFATFVL <sup>F</sup> DHVPAL <sup>Y</sup> QAYHAENQRKRGE--                                                                 | 312 |
| pRL7      | IMIDRKAMPDFAAFVLEQLPAL <sup>Y</sup> E <sup>A</sup> HRAKQKQKKEA--                                                                  | 312 |
| C58linear | ISIDKNEAPEFAEFVLEHL <sup>Q</sup> T <sup>L</sup> FAEYRSKQ-----                                                                     | 337 |
| pRL12     | FVFDGKTAPGFDQFVQERL <sup>K</sup> G <sup>L</sup> FQEFNKDRGA-----                                                                   | 333 |
| pRtTA1d   | FVFDGKTAPGFDQFVQERL <sup>K</sup> G <sup>L</sup> FQEFNKDRGA-----                                                                   | 333 |
| pNGR234b  | LAFS <sup>K</sup> AAAPGFAEFVVRGR <sup>L</sup> ES <sup>L</sup> Y <sup>L</sup> EYQ <sup>Q</sup> ETGD-----                           | 334 |
| p42b      | I <sup>A</sup> LKA <sup>E</sup> KASAF <sup>G</sup> AYIASN <sup>L</sup> DR <sup>L</sup> Y <sup>E</sup> A <sup>F</sup> EKTQDLTKNGDQ | 351 |
| pRLG204   | I <sup>A</sup> LKA <sup>E</sup> KASAF <sup>G</sup> AYIASN <sup>L</sup> DR <sup>L</sup> Y <sup>E</sup> A <sup>F</sup> EKTQDSTKNGDQ | 350 |
| pR132504  | LALKAKDAVGF <sup>G</sup> D <sup>F</sup> LSES <sup>L</sup> TD <sup>L</sup> Y <sup>K</sup> AYRGRN--IQQGE-                           | 326 |
| pRL9      | LALKAKDAVGF <sup>G</sup> D <sup>F</sup> LSES <sup>L</sup> TD <sup>L</sup> Y <sup>K</sup> AYRGRN--VQQGE-                           | 326 |
| pRLG201   | LSMKAKNAGRF <sup>G</sup> EFLSSR <sup>L</sup> DV <sup>L</sup> Y <sup>E</sup> QFLAEE--SK----                                        | 322 |
| pNGR234a  | LSMKSRNAGPF <sup>G</sup> RYIADN <sup>L</sup> DR <sup>L</sup> Y <sup>A</sup> E <sup>F</sup> LEQG--NRKED-                           | 326 |
| pR132502  | I <sup>A</sup> LKTGDAPDF <sup>G</sup> AYISRR <sup>L</sup> DE <sup>L</sup> Y <sup>E</sup> AYRAGR--LQAGE-                           | 331 |
| pRtTA1b   | I <sup>A</sup> LKTGDAPDF <sup>G</sup> AYISRR <sup>L</sup> DE <sup>L</sup> Y <sup>E</sup> AYRAGK--LQAGE-                           | 331 |
| pRLG202   | I <sup>A</sup> LKTGDAPDF <sup>G</sup> AYISRR <sup>L</sup> DE <sup>L</sup> Y <sup>E</sup> AYRAGR--LQAGE-                           | 331 |
| p42e      | I <sup>A</sup> LKTGDAPDF <sup>G</sup> AYISRR <sup>L</sup> DE <sup>L</sup> Y <sup>E</sup> AYQAGK--LQAGE-                           | 331 |
| pRL8      | LMIDKKAAP <sup>F</sup> GEY <sup>L</sup> MSA <sup>L</sup> PEI <sup>Y</sup> ASFKKSK---Q----                                         | 319 |
| pTiBo542  | LMIDKKAAP <sup>F</sup> ADY <sup>L</sup> MSA <sup>L</sup> PEI <sup>Y</sup> ASFKRSK---Q----                                         | 319 |
| pTiC58    | LVFDERLVPT <sup>F</sup> GEYVADQ <sup>L</sup> DS <sup>L</sup> Y <sup>A</sup> QFIETNGGGKLDQ-                                        | 336 |
| pTiA6     | LIFDEKLVPA <sup>F</sup> GEFVADQ <sup>L</sup> DR <sup>L</sup> Y <sup>A</sup> QFIETTDGEKLDQ-                                        | 347 |
| p42a      | ITFE <sup>E</sup> KVVP <sup>A</sup> F <sup>G</sup> QFVSAK <sup>L</sup> DQ <sup>L</sup> Y <sup>K</sup> E <sup>F</sup> QELNGDGDER-- | 335 |
| pRtTA1a   | ITIPENKVPGLSAWLVER <sup>L</sup> PAL <sup>V</sup> VEEYR <sup>K</sup> QTGETPMG--                                                    | 342 |
| pRi1724   | IEMNRDRDET <sup>F</sup> AKFVMEQ <sup>L</sup> PAL <sup>Y</sup> ANFRKENPSSE----                                                     | 334 |
| pRtTA1c   | ITVKS---AAFSEFLAQRL <sup>I</sup> GLAAEFEEENE <sup>G</sup> K-----                                                                  | 329 |
| pRL10     | ITVKS---AAFSEFLAQRL <sup>A</sup> GLAAEFEEENE <sup>G</sup> K-----                                                                  | 329 |
| pRLG203   | VTIPK-AEDA <sup>F</sup> ARWL <sup>A</sup> GRMPE <sup>L</sup> MREYEHQAASN-----                                                     | 332 |

Figure 3

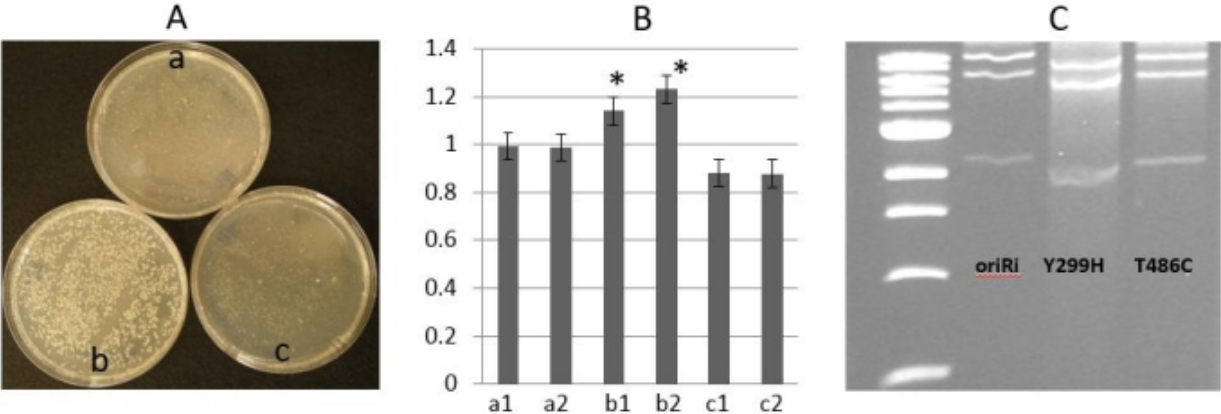

Figure 4

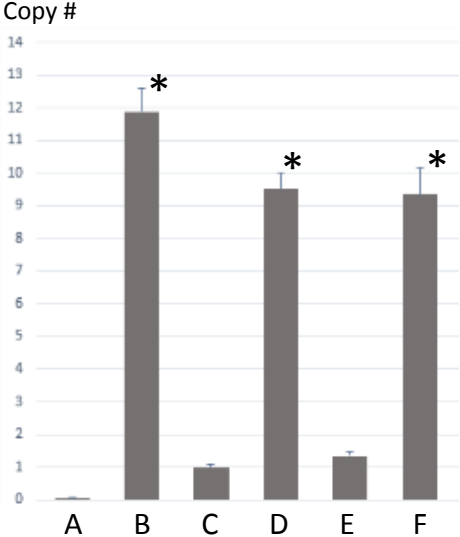

Figure 5

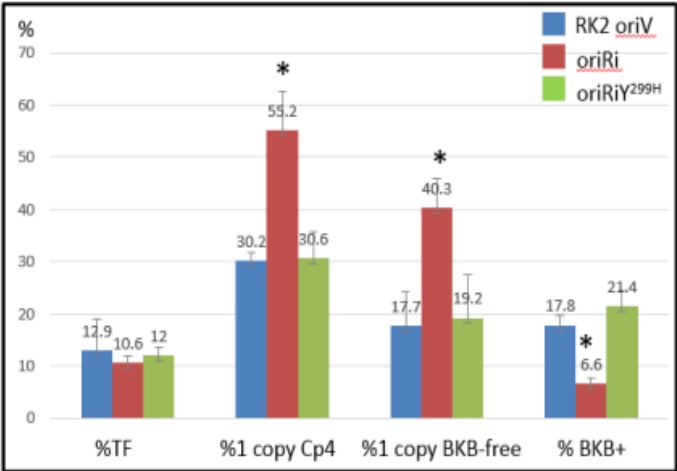

Source: https://www.biorxiv.org/content/10.1101/365320v1.full.pdf
